# Supplementary material for: Associations of bovine beta-casein and kappa-casein genotypes with genomic merit in Holstein Friesian cattle
Source: Copernicus journal article supplement (doi:10.5194/aab-67-61-2024), 2024-02-14
Supplement: Supplementary file [file aab-67-61-2024-supplement.pdf]

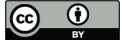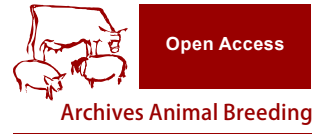

*Supplement of*

## **Associations of bovine beta-casein and kappa-casein genotypes with genomic merit in Holstein Friesian cattle**

**Sena Ardicli et al.**

*Correspondence to:* Sena Ardicli (sardicli@uludag.edu.tr)

The copyright of individual parts of the supplement might differ from the article licence.

**Table S1.** The descriptive data on genetic merit values (PTAs, TPI, and NM) of the studied Holstein-Friesian population ( $n=805$ ).

| <b>Variable</b> | <b>Mean</b> | <b>Standard Error</b> | <b>Coefficient of Variation</b> | <b>Minimum</b> | <b>Maximum</b> |
|-----------------|-------------|-----------------------|---------------------------------|----------------|----------------|
| Milk yield      | 708.20      | 19.500                | 78.90                           | -1948.00       | 2144.00        |
| Fat             | 33.61       | 0.726                 | 61.79                           | -33.00         | 105.00         |
| % Fat           | 0.02        | 0.003                 | 385.13                          | -0.21          | 0.29           |
| Protein         | 26.18       | 0.478                 | 52.18                           | -39.00         | 62.00          |
| % Protein       | 0.01        | 0.001                 | 255.14                          | -0.10          | 0.10           |
| CFP             | 59.79       | 1.080                 | 51.78                           | -72.00         | 153.00         |
| PL              | 2.84        | 0.052                 | 51.98                           | -1.60          | 6.60           |
| SCS             | 2.91        | 0.004                 | 4.07                            | 2.51           | 3.31           |
| DPR             | -0.08       | 0.048                 | -1705.19                        | -4.40          | 4.30           |
| LV              | 0.57        | 0.055                 | 253.18                          | -3.50          | 5.40           |
| UDC             | 0.33        | 0.031                 | 254.29                          | -3.00          | 3.60           |
| FLC             | 0.09        | 0.021                 | 616.92                          | -2.61          | 1.74           |
| TPI             | 2376.30     | 6.030                 | 7.08                            | 1859.00        | 2884.00        |
| NM              | 413.53      | 6.050                 | 41.83                           | -190.00        | 904.00         |

CFP: Combined fat and protein; PL: Productive life; SCS: Somatic cell score; DPR: Daughter pregnancy rate; LV: Livability; UDC: Udder Composite; FLC: feet-legs composite; TPI: Total performance index; NM: Net merit
